# Supplementary material for: On the Origin of Alkali-Catalyzed Aromatization of Phenols
Source: MDPI journal article supplement (doi:10.3390/polym11071119), 2019-07-02
Supplement: s1 [file s1]

## Supplementary Information

### On the origin of alkali catalyzed aromatization of phenols

Yu Ji<sup>1,2</sup>, Qiang Yao<sup>1,2,\*</sup>, Yueying Zhao<sup>1</sup>, Weihong Cao<sup>1</sup>

<sup>1</sup>*Ningbo Institute of Materials Technology and Engineering, Chinese Academy of Sciences, Ningbo, Zhejiang 315201, China*

<sup>2</sup>*University of Chinese Academy of Sciences, Beijing 100049, China;*

\*Correspondence: [yaoqiang@nimte.ac.cn](mailto:yaoqiang@nimte.ac.cn)

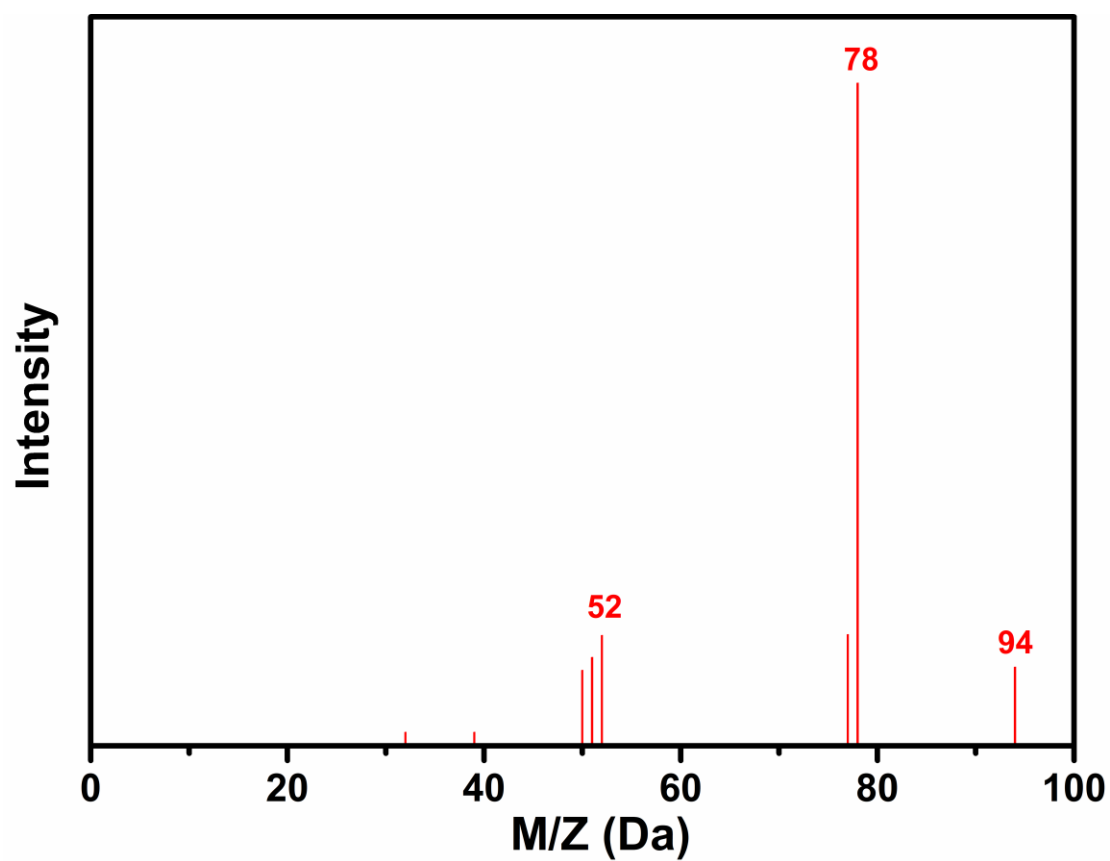

**Figure S1.** Mass spectrum of gaseous products of sodium phenolate at 550°C.

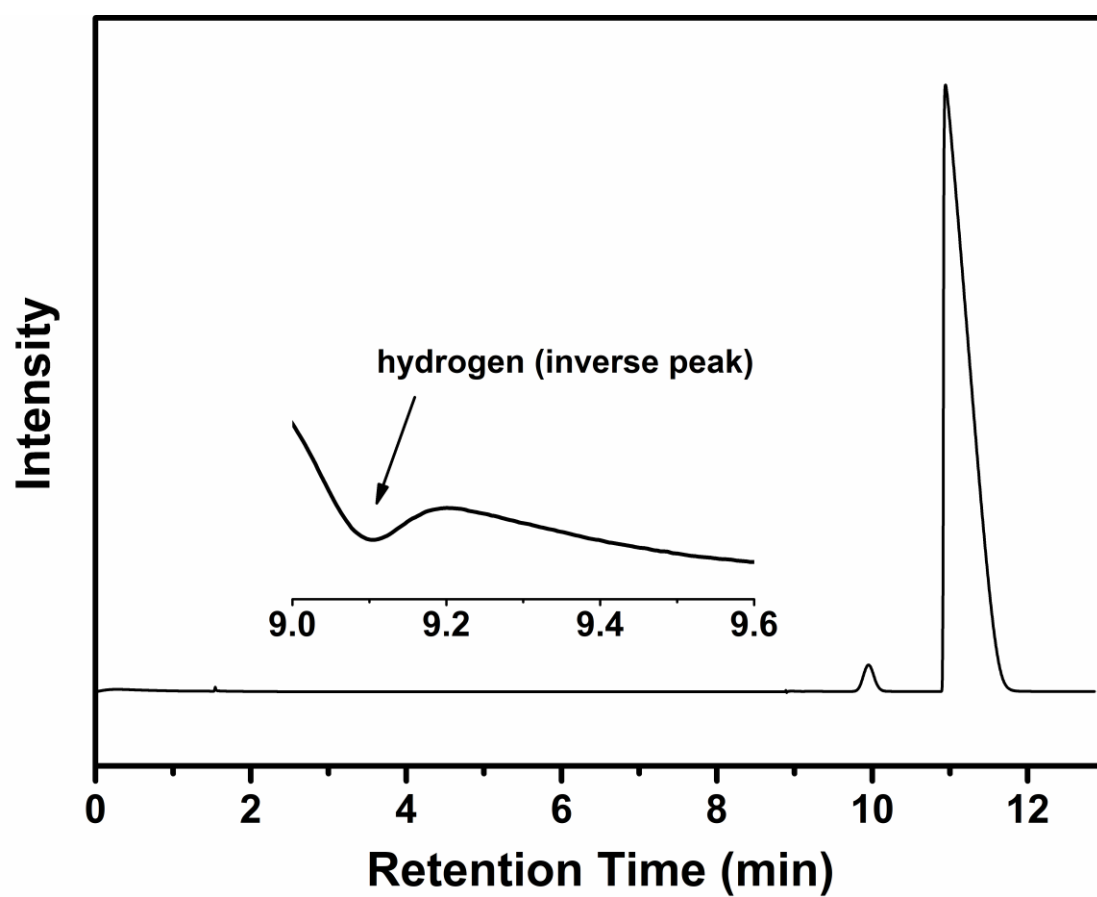

**Figure S2.** GC spectrum of the collected off-gas of sodium phenolate.

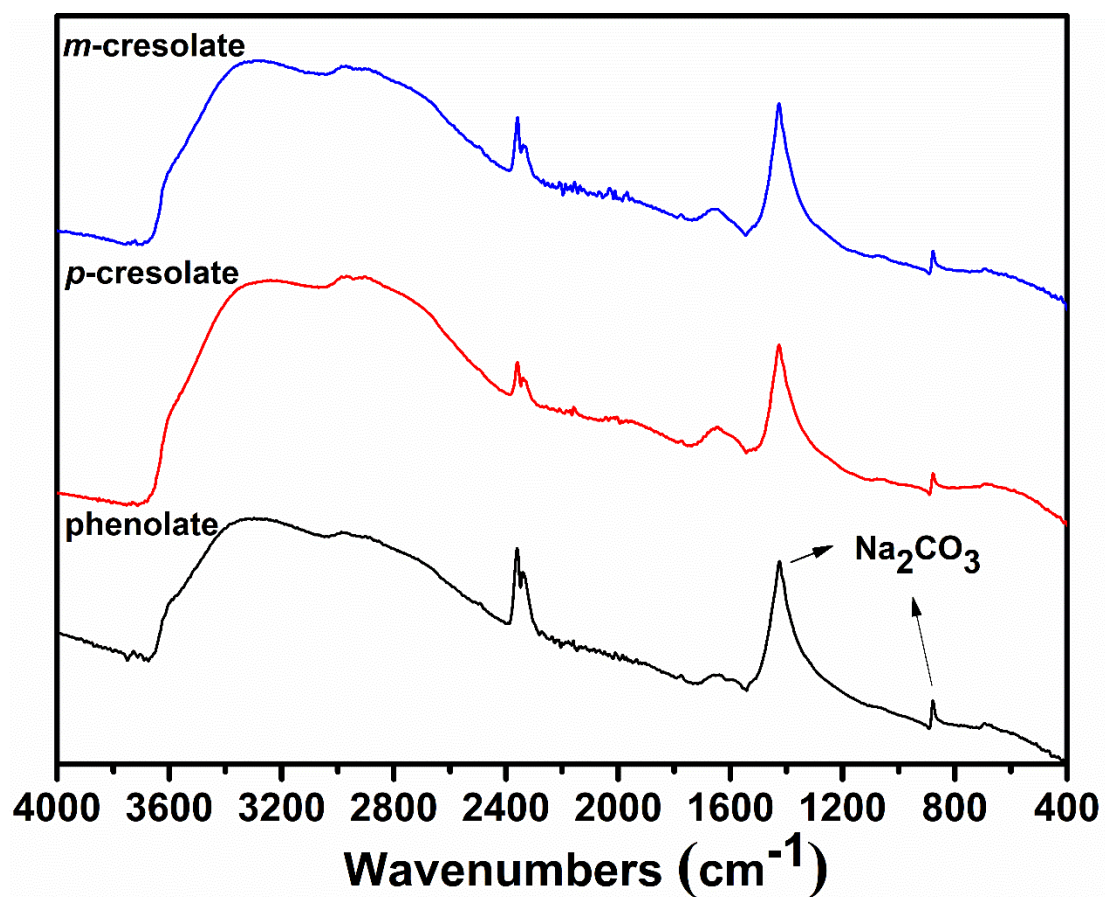

**Figure S3.** FTIR spectra of the residues collected after the main degradation steps of sodium phenolate, *p*-cresolate and *m*-cresolate.
